# Supplementary material for: Calculating age-specific prevalence rates of female genital mutilation / cutting (FGM/C) for use as an input variable in extrapolation calculations and as predictors of future prevalence in countries of origin
Source: PubMed Central journal article supplement (PMC11801577; doi:10.1371/journal.pone.0317845), 2025-02-06
Supplement: pone.0317845.s004.pdf [file pone.0317845.s004.pdf]

Sean Callaghan

May 2024 submission

December 2024 resubmission

PLOS One

December 27, 2024

Dear academic editor and reviewers,

**RE: Response to reviewers with regards to PONE-D-24-20214R1**

The resubmission enclosed with this letter, *Calculating Age-Specific Prevalence Rates of female genital mutilation / cutting (FGM/C) for use as an input variable in extrapolation calculations and as predictors of future prevalence in countries of origin*, separates the supplemental data from the manuscript as requested.

We thank you for your time in considering this resubmission.

Sincerely,

A handwritten signature in black ink, appearing to be 'Sean Callaghan', with a small red mark to the right.

Sean Callaghan
